# Supplementary material for: Nanowire architectures for iodide free dye-sensitized solar cells
Source: Royal Society of Chemistry journal article supplement (doi:10.1039/c3ta13997b), 2013-12-18
Supplement: c3ta13997b.pdf [file c3ta13997b.pdf]

## Supporting Information

### Nanowire architectures for iodide free dye sensitized solar cells

Venkat Kalyan Vendra,<sup>a</sup> Tu Nguyen,<sup>a</sup> Thad Druffel,<sup>b</sup> Delaina A. Amos,<sup>a</sup> Jacek Jasinski,  
Mahendra K. Sunkara<sup>a,b,\*</sup>

<sup>a</sup> Department of Chemical Engineering, University of Louisville, Louisville, KY 40292, USA.

<sup>b</sup> Conn Center for Renewable Energy Research, University of Louisville, Louisville, KY 40292, USA.

\* Corresponding authors email: [mahendra@louisville.edu](mailto:mahendra@louisville.edu)

Table S1 lists the redox potentials and the maximum open circuit potentials that can be obtained from these redox couples.

**Table S1.** Redox potentials of different redox electrolytes and maximum theoretical open-circuit voltages for titania and tin oxide

| Redox electrolyte        | Redox potential vs. NHE | Maximum open-circuit voltage for TiO <sub>2</sub> | Maximum open-circuit voltage for SnO <sub>2</sub> |
|--------------------------|-------------------------|---------------------------------------------------|---------------------------------------------------|
| Iodide/Tri-iodide        | 0.50 V                  | 1.0 V                                             | 0.60 V                                            |
| Ferrocene /Ferrocenium   | 0.62 V                  | 1.12 V                                            | 0.72 V                                            |
| TEMPO/TEMPO <sup>+</sup> | 0.74 V                  | 1.24 V                                            | 0.84 V                                            |

The higher maximum redox potentials that can be achieved with these redox couples make them promising electrolytes for use in dye-sensitized solar cells (DSCs). It is important to note that proper energetic alignment between the dye and the redox couple is necessary to achieve high performance with these redox electrolytes. Specifically, the HOMO level of the dye should be positive enough such that there is sufficient driving force for the dye regeneration.

Figure S1 compares the current-voltage characteristics of DSCs fabricated with unpassivated SnO<sub>2</sub> NWs and TiO<sub>2</sub> NPs using TEMPO redox electrolyte. The SnO<sub>2</sub> NWs show

enhanced current density and voltage when compared with  $\text{TiO}_2$  NPs due to reduced recombination losses and improved charge transport in  $\text{SnO}_2$  NWs.

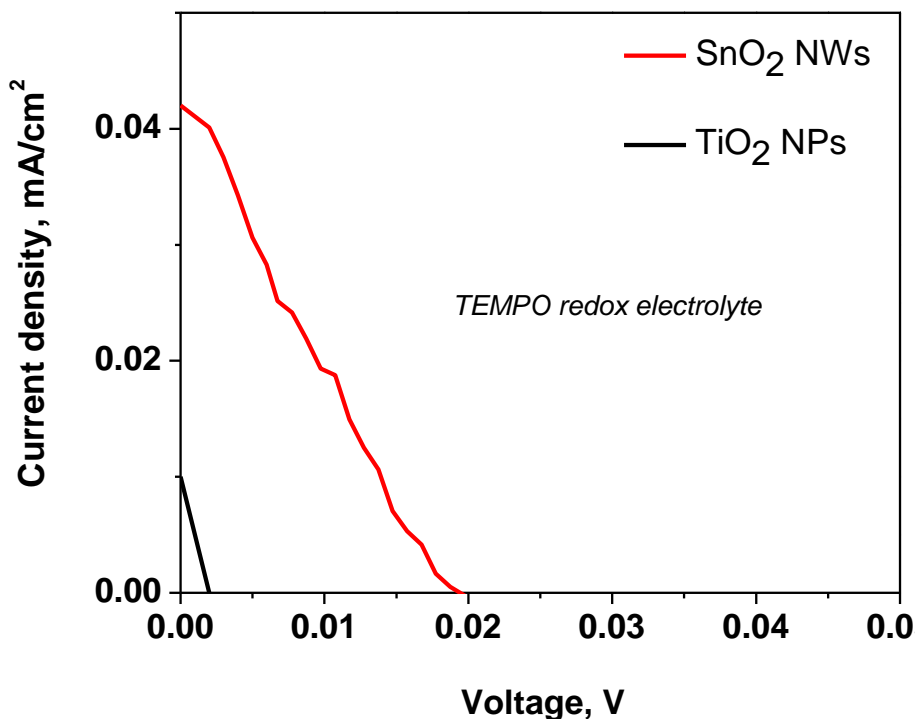

**Figure S1.** Current-Voltage characteristics of unpassivated tin oxide nanowires and titania nanoparticles with TEMPO redox couple

The lower values of short-circuit density, open-circuit voltage and fill factor when compared with ferrocene redox couple (shown in Figure 2a) could be attributed to the faster recombination kinetics with TEMPO redox couple.

Figure S2b shows the current-voltage characteristics of  $\text{Al}_2\text{O}_3$  passivated  $\text{TiO}_2$  NPs and  $\text{SnO}_2$  NWs coated with a 100 nm shell of  $\text{TiO}_2$  by atomic layer deposition (Figure S2a). The TEMPO redox couple was used for the experiments.

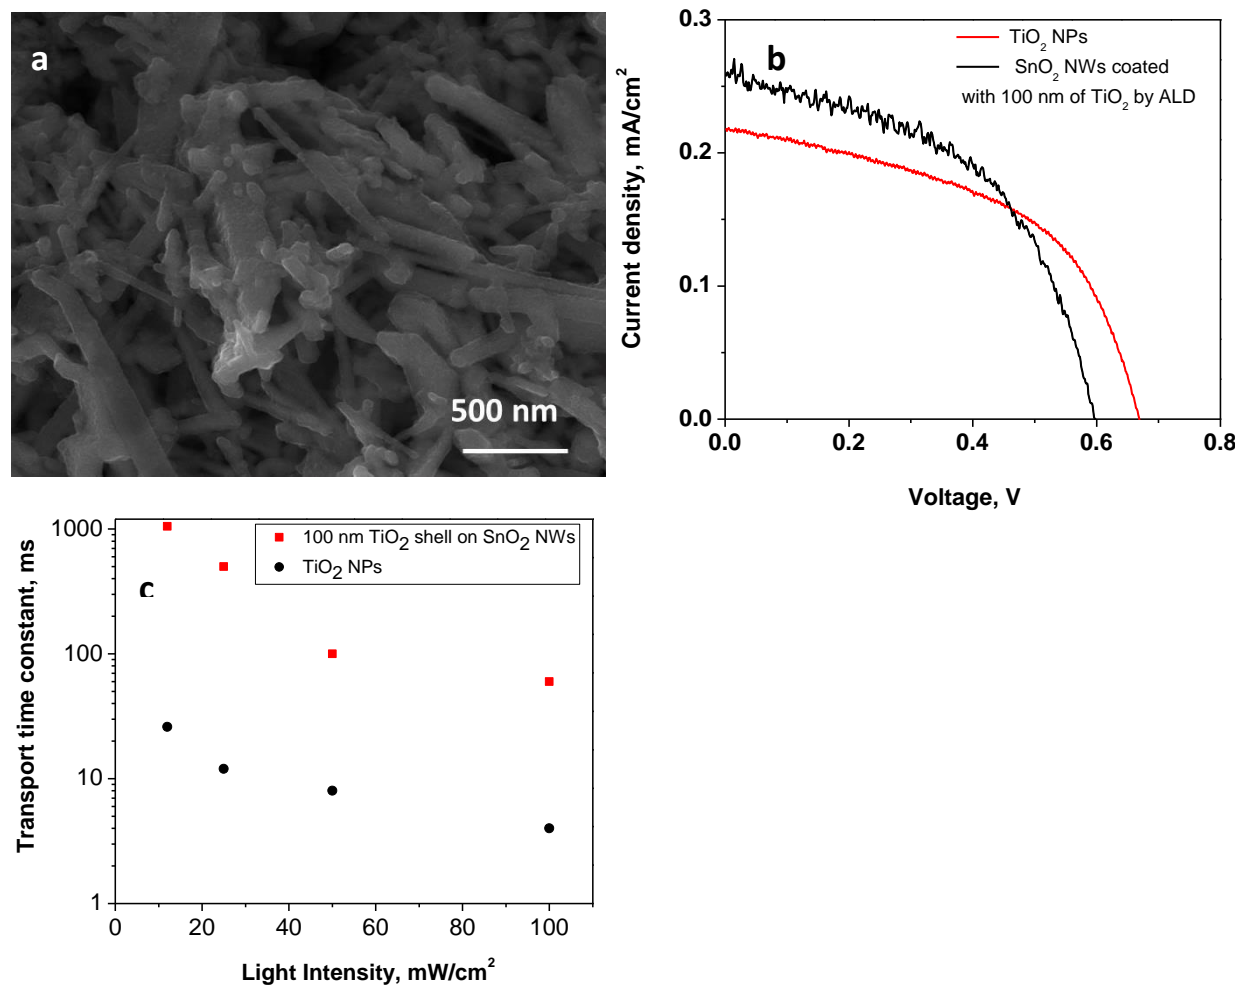

**Figure S2** (a) SEM image showing SnO<sub>2</sub> nanowires coating with 100 nm of TiO<sub>2</sub> by atomic layer deposition (b) Current-Voltage characteristics of TiO<sub>2</sub> NPs and SnO<sub>2</sub>-TiO<sub>2</sub> core shell NW architectures (c) Comparison of transport time constants of TiO<sub>2</sub> NPs and SnO<sub>2</sub>-TiO<sub>2</sub> core shell NW architectures

The enhancement in current density is not as significant as the case of SnO<sub>2</sub> NWs coated with anatase TiO<sub>2</sub> NPs by electrophoretic deposition, where a ten-fold enhancement in current density. This can be explained by considering the poor electron transport and high resistivity of amorphous TiO<sub>2</sub>.<sup>1</sup> The electrophoretic deposition approach described in this work is much simpler and more effective way to create crystalline shells of titania with good charge transport properties. Further, the increased surface roughness in the case of electrophoretic deposition leads to increased surface area for dye adsorption.

Figure S3 shows the electron transport times and electron lifetimes in rutile  $\text{TiO}_2$  NWs,  $\text{TiCl}_4$  treated rutile NWs and  $\text{TiO}_2$  NPs. The characterization was performed using an iodide redox electrolyte without any surface passivation of  $\text{TiO}_2$ . There is no difference in the electron transport between  $\text{TiO}_2$  nanoparticles and single crystal rutile  $\text{TiO}_2$  NWs. The presence of a large number of  $\text{Ti}^{+3}$  trap states in  $\text{TiO}_2$  lower the electron mobility and result in slow electron transport in  $\text{TiO}_2$  NWs.<sup>2</sup> The electron lifetimes in the rutile  $\text{TiO}_2$  NWs were an order of magnitude higher than  $\text{TiO}_2$  NPs because of the surface trap state concentration on  $\text{TiO}_2$  NWs when compared with  $\text{TiO}_2$  NPs.

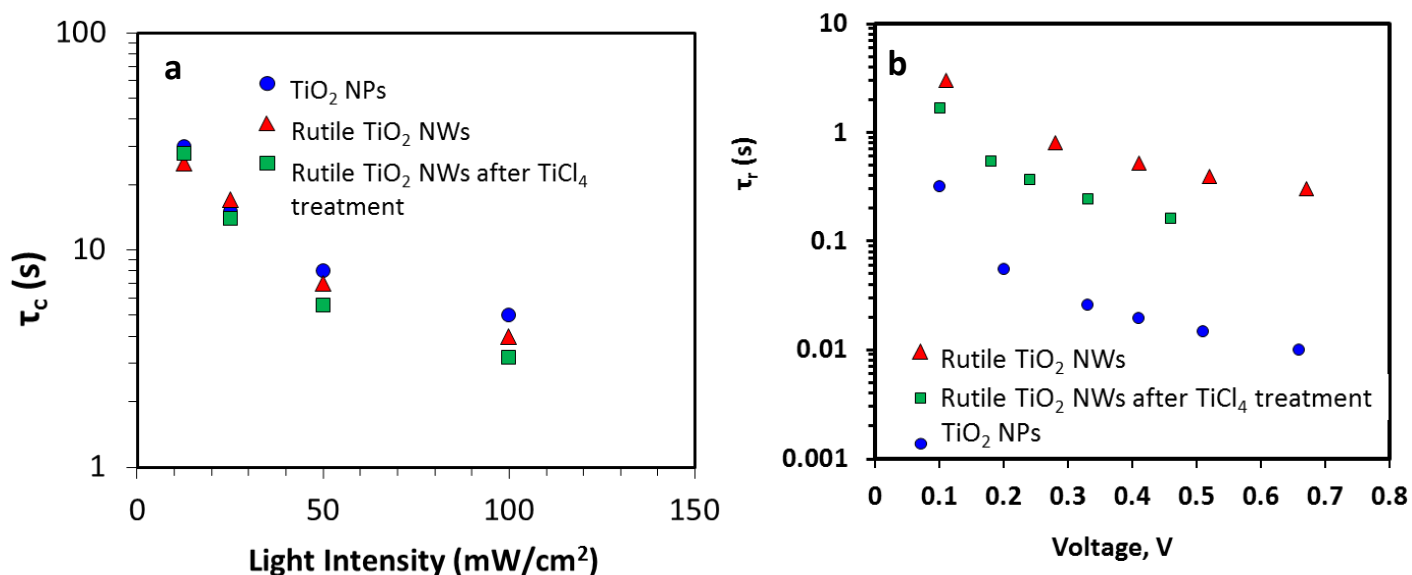

**Figure S3.** (a) Electron transport and (b) electron lifetimes in rutile  $\text{TiO}_2$  NWs,  $\text{TiCl}_4$  treated rutile NWs and  $\text{TiO}_2$  NPs characterized using an iodide/triiodide redox couple.

Figure S4 compares the dye adsorption spectrum (in Kubelka-Munk units) for titania NPs and tin oxide NW hybrid architectures after dye adsorption. The hybrid architectures show a significantly low dye adsorption due to the low surface area.

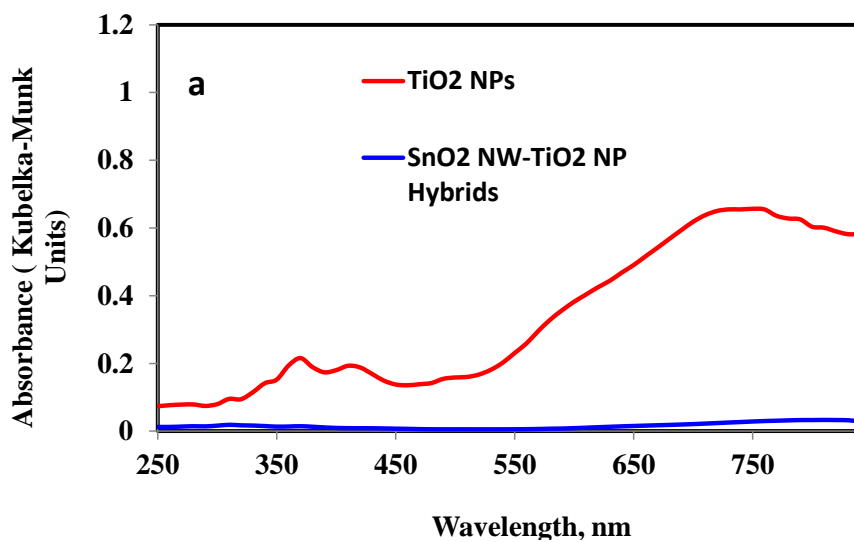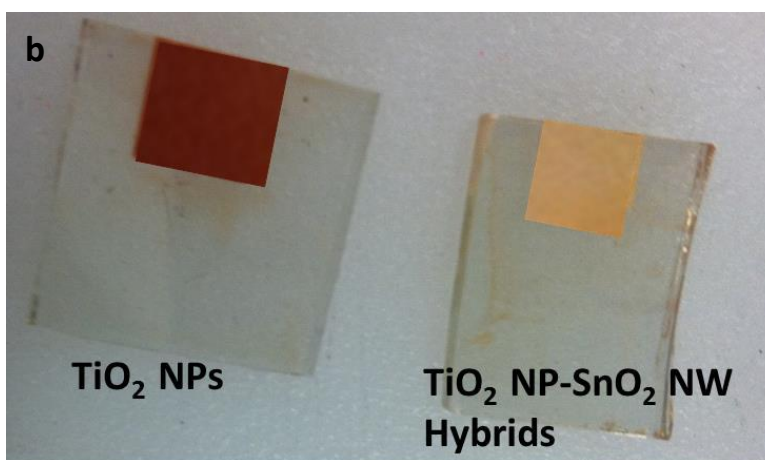

Figure S4. (a) Comparison of absorbance spectrum of the N-719 sensitized TiO<sub>2</sub> NPs and TiO<sub>2</sub> NP-SnO<sub>2</sub> NW Hybrids (b) picture showing TiO<sub>2</sub> NPs and TiO<sub>2</sub> NP-SnO<sub>2</sub> NW Hybrids after sensitization with N-719 dye.

To quantify the dye loading on the TiO<sub>2</sub> NPs- SnO<sub>2</sub> NW hybrid architectures and titania nanoparticles, dye desorption experiments were performed. The UV-Vis spectrum of N-719 dye solution of different concentrations were measured to obtain a calibration curve (Figure S5).

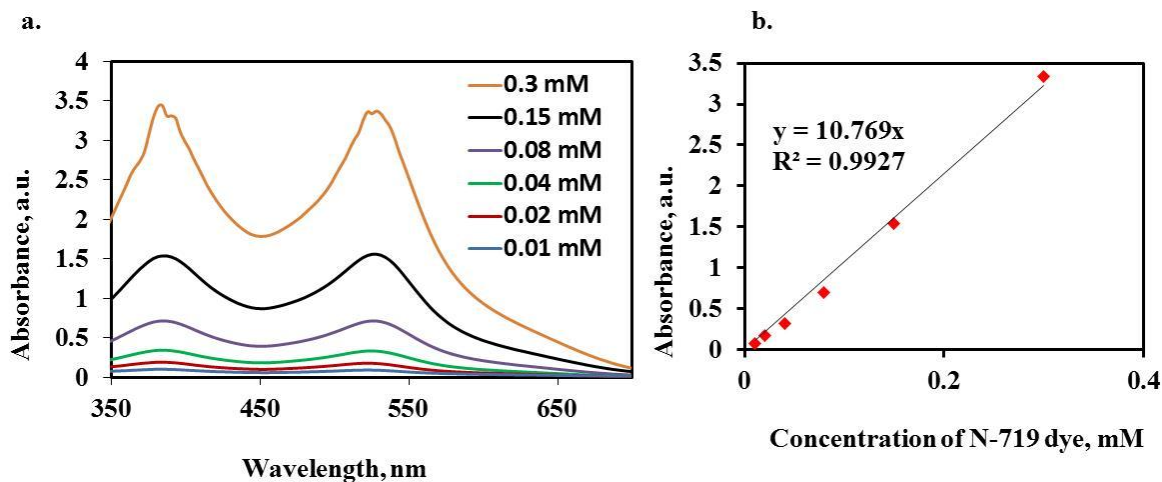

Figure S5 (a) UV-Vis spectra of different concentration of N-719 dye in ethanol and (b) calibration curve obtained from part (a). The absorbance at 531 nm was used to obtain the calibration curve.

The dye desorption experiments were performed by soaking the N-719 sensitized electrodes in 6 mL of 0.1 M NaOH solution for 1h. Table S2 shows the dye loading characteristics and surface area of the different samples. For calculating the surface area, the area of single N-719 dye molecule is taken as  $1.6 \times 10^{-18} \text{ m}^2$ .<sup>15</sup> In addition the BET surface area of the electrodes was also determined (Micromeritics Tristar 3000).

**Table S2.** Dye loading characteristics and surface area measurements of different electrodes

| <b>Sample</b>                                      | <b>Dye loading,<br/>moles.cm<sup>-2</sup> of<br/>substrate</b> | <b>Surface area, m<sup>2</sup>/g, (from dye<br/>desorption experiments)</b> | <b>BET surface area,<br/>m<sup>2</sup>/g</b> |
|----------------------------------------------------|----------------------------------------------------------------|-----------------------------------------------------------------------------|----------------------------------------------|
| TiO <sub>2</sub> NPs                               | 3.8 x 10 <sup>-7</sup>                                         | 82.9                                                                        | 89.4                                         |
| TiO <sub>2</sub> NP-SnO <sub>2</sub><br>NW hybrids | 1.5 x 10 <sup>-7</sup>                                         | 40.2                                                                        | 33.3                                         |
| SnO <sub>2</sub> NWs                               | 0.8 x 10 <sup>-7</sup>                                         | 12.1                                                                        | 10.1                                         |

**Table S3.** Photovoltaic characteristics for different electrolytes used with organic dyes

| <i>Electrolyte</i>       | <i>Dye</i>            | $V_{oc}$<br>V | $J_{sc}$<br>mA/cm <sup>2</sup> | % $\eta$ | <i>Dye</i><br><i>HOMO</i> ,<br>V vs. SHE | <i>Electrolyte redox</i><br><i>potential</i> ,<br>V vs. SHE | <i>Ref.</i> |
|--------------------------|-----------------------|---------------|--------------------------------|----------|------------------------------------------|-------------------------------------------------------------|-------------|
| $Br^-/Br_3^-$            | EOSIN-Y               | 0.81          | 4.63                           | 2.6      | 1.2                                      | 1.1                                                         | 3           |
| $[Fe(CN)_6]^{4-}/^{3-}$  | MK-2                  | 0.73          | 5.46                           | 2.99     | 0.9                                      | 0.42                                                        | 4           |
| $[Co(dtbb)_3]^{2+/3+}$   | D35                   | 0.7           | 8.5                            | 3.0      | 1.1                                      | 0.6                                                         | 5           |
| $[Co(phen)_3]^{2+/3+}$   | D35                   | 0.92          | 8.2                            | 4.5      | 1.1                                      | 0.6                                                         | 5           |
| $[Co(dmb)_3]^{2+/3+}$    | D35                   | 0.75          | 10.5                           | 4.7      | 1.1                                      | 0.4                                                         | 5           |
| TEMPO/TEMPO <sup>+</sup> | D-149                 | 0.83          | 9.4                            | 5.4      | 1.1                                      | 0.8                                                         | 6           |
| $[Co(bpy)_3]^{2+/3+}$    | D35                   | 0.92          | 10.5                           | 5.8      | 1.1                                      | 0.6                                                         | 5           |
| $Fc/Fc^+$                | Carbz-<br>PAHTDT<br>T | 0.84          | 12.2                           | 7.5      | 0.9                                      | 0.63                                                        | 7           |
| $[Co(bpy-pz)_2]^{3+/2+}$ | Y-123                 | 0.99          | 13.06                          | 10.1     | 1.1                                      | 0.9                                                         | 8           |
| $I^-/I_3^-$              | CYC-B11               | 0.74          | 20.1                           | 11.5     | 1.0                                      | 0.5                                                         | 9           |
| $Co^{2+/3+}$ tris(bpy)   | YD2-o-<br>C8          | 0.96          | 17.3                           | 12.3     | 0.8                                      | 0.5                                                         | 10          |



**Table S4.** Photovoltaic characteristics for different electrolytes used with ruthenium dyes

| <i>Electrolyte</i>                            | <i>Dye</i> | $V_{oc}$<br>V | $J_{sc}$<br>mA/cm <sup>2</sup> | % $\eta$ | <i>Dye</i><br><i>HOMO</i> ,<br>V vs. SHE | <i>Electrolyte redox</i><br><i>potential</i> ,<br>V vs. SHE | <i>Ref.</i> |
|-----------------------------------------------|------------|---------------|--------------------------------|----------|------------------------------------------|-------------------------------------------------------------|-------------|
| [Cu(phen) <sub>2</sub> ] <sup>2+/+</sup>      | N-719      | 0.57          | 0.48                           | 0.12     | 1.12                                     | 0.1                                                         | 11          |
| Fc/Fc <sup>+</sup>                            | N-719      | 0.55          | 1.0                            | 0.33     | 1.12                                     | 0.63                                                        | 7           |
| [Fe(CN) <sub>6</sub> ] <sup>4-/3-</sup>       | Z-907      | 0.65          | 1.79                           | 0.79     | 0.98                                     | 0.42                                                        | 4           |
| Br <sup>-</sup> /Br <sub>3</sub> <sup>-</sup> | N-719      | 0.55          | 3.51                           | 1.05     | 1.12                                     | 1.1                                                         | 3           |
| [Cu(SP)(mmt)] <sup>0/-</sup>                  | N-719      | 0.66          | 4.4                            | 1.3      | 1.12                                     | 0.49                                                        | 11          |
| [Cu(dmp) <sub>2</sub> ] <sup>2+/+</sup>       | N-719      | 0.79          | 3.2                            | 1.4      | 1.12                                     | 0.86                                                        | 11          |
| [Ni-bis(dicarbodillide)] <sup>0/-1</sup>      | N-719      | 0.64          | 3.76                           | 1.5      | 1.12                                     | 0.49                                                        | 12          |
| Dif sulfide/thiolate                          | Z-907      | 0.68          | 16.18                          | 6.44     | 0.98                                     | 0.485                                                       | 13          |
| I <sup>-</sup> /I <sub>3</sub> <sup>-</sup>   | N-719      | 0.78          | 16.25                          | 9.1      | 1.12                                     | 0.5                                                         | 14          |

## References

1. Law, M.; Greene, L. E.; Johnson, J. C.; Saykally, R.; Yang, P. D., Nanowire dye-sensitized solar cells. *Nature Materials* **2005**, 4 (6), 455-459.
2. Richter, C.; Schmuttenmaer, C. A., Exciton-like trap states limit electron mobility in TiO<sub>2</sub> nanotubes. *Nature Nanotechnology* **2010**, 5 (11), 769-772.
3. Wang, Z.-S.; Sayama, K.; Sugihara, H., Efficient eosin Y dye-sensitized solar cell containing Br<sup>-</sup>/Br<sub>3</sub><sup>-</sup> electrolyte. *The Journal of Physical Chemistry B* **2005**, 109 (47), 22449-22455.
4. Daeneke, T.; Uemura, Y.; Duffy, N. W.; Mozer, A. J.; Koumura, N.; Bach, U.; Spiccia, L., Aqueous Dye-Sensitized Solar Cell Electrolytes Based on the Ferricyanide-Ferrocyanide Redox Couple. *Advanced Materials* **2012**, 24 (9), 1222-1225.

5. Feldt, S. M.; Gibson, E. A.; Gabrielsson, E.; Sun, L.; Boschloo, G.; Hagfeldt, A., Design of organic dyes and cobalt polypyridine redox mediators for high-efficiency dye-sensitized solar cells. *Journal of the American Chemical Society* **2010**, *132* (46), 16714-16724.
6. Zhang, Z.; Chen, P.; Murakami, T. N.; Zakeeruddin, S. M.; Graetzel, M., The 2,2,6,6-tetramethyl-1-piperidinyloxy radical: An efficient, iodine-free redox mediator for dye-sensitized solar cells. *Advanced Functional Materials* **2008**, *18* (2), 341-346.
7. Daeneke, T.; Kwon, T.-H.; Holmes, A. B.; Duffy, N. W.; Bach, U.; Spiccia, L., High-efficiency dye-sensitized solar cells with ferrocene-based electrolytes. *Nature Chemistry* **2011**, *3* (3), 211-215.
8. Yum, J.-H.; Baranoff, E.; Kessler, F.; Moehl, T.; Ahmad, S.; Bessho, T.; Marchioro, A.; Ghadiri, E.; Moser, J.-E.; Yi, C., A cobalt complex redox shuttle for dye-sensitized solar cells with high open-circuit potentials. *Nature Communications* **2012**, *3*, 631.
9. Chen, C.-Y.; Wang, M.; Li, J.-Y.; Pootrakulchote, N.; Alibabaei, L.; Ngoc-le, C.-h.; Decoppet, J.-D.; Tsai, J.-H.; Grätzel, C.; Wu, C.-G., Highly efficient light-harvesting ruthenium sensitizer for thin-film dye-sensitized solar cells. *Acs Nano* **2009**, *3* (10), 3103-3109.
10. Yella, A.; Lee, H.-W.; Tsao, H. N.; Yi, C.; Chandiran, A. K.; Nazeeruddin, M. K.; Diau, E. W.-G.; Yeh, C.-Y.; Zakeeruddin, S. M.; Grätzel, M., Porphyrin-sensitized solar cells with cobalt (II/III)-based redox electrolyte exceed 12 percent efficiency. *Science* **2011**, *334* (6056), 629-634.
11. Hattori, S.; Wada, Y.; Yanagida, S.; Fukuzumi, S., Blue copper model complexes with distorted tetragonal geometry acting as effective electron-transfer mediators in dye-sensitized solar cells. *Journal of the American Chemical Society* **2005**, *127* (26), 9648-9654.
12. Li, T. C.; Spokoyny, A. M.; She, C.; Farha, O. K.; Mirkin, C. A.; Marks, T. J.; Hupp, J. T., Ni (III)/(IV) bis (dicarbollide) as a fast, noncorrosive redox shuttle for dye-sensitized solar cells. *Journal of the American Chemical Society* **2010**, *132* (13), 4580-4582.
13. Wang, M.; Chamberland, N.; Breau, L.; Moser, J.-E.; Humphry-Baker, R.; Marsan, B.; Zakeeruddin, S. M.; Grätzel, M., An organic redox electrolyte to rival triiodide/iodide in dye-sensitized solar cells. *Nature Chemistry* **2010**, *2* (5), 385-389.
14. Ito, S.; Chen, P.; Comte, P.; Nazeeruddin, M. K.; Liska, P.; Péchy, P.; Grätzel, M., Fabrication of screen-printing pastes from TiO<sub>2</sub> powders for dye-sensitized solar cells. *Progress in photovoltaics: research and applications* **2007**, *15* (7), 603-612.
15. <http://www.rsc.org/suppdata/nr/c2/c2nr31127e/c2nr31127e.pdf>
